# Supplementary material for: Influence of ventilatory parameters on the concentration of exhaled volatile organic compounds in mechanically ventilated patients
Source: Royal Society of Chemistry journal article supplement (doi:10.1039/d3an00786c), 2023-01-01

**Table S1.** Procedure to evaluate repeatability: for each VOC, local maximums (○) are extracted and percentage relative standard deviation (%) is calculated based on all the extracted data points. RSD%'s are reported for all VOCs of interest whereas a graphic representation is provided in the case of isoprene. The measurement was carried out on patient no. 13 under baseline ventilator conditions.

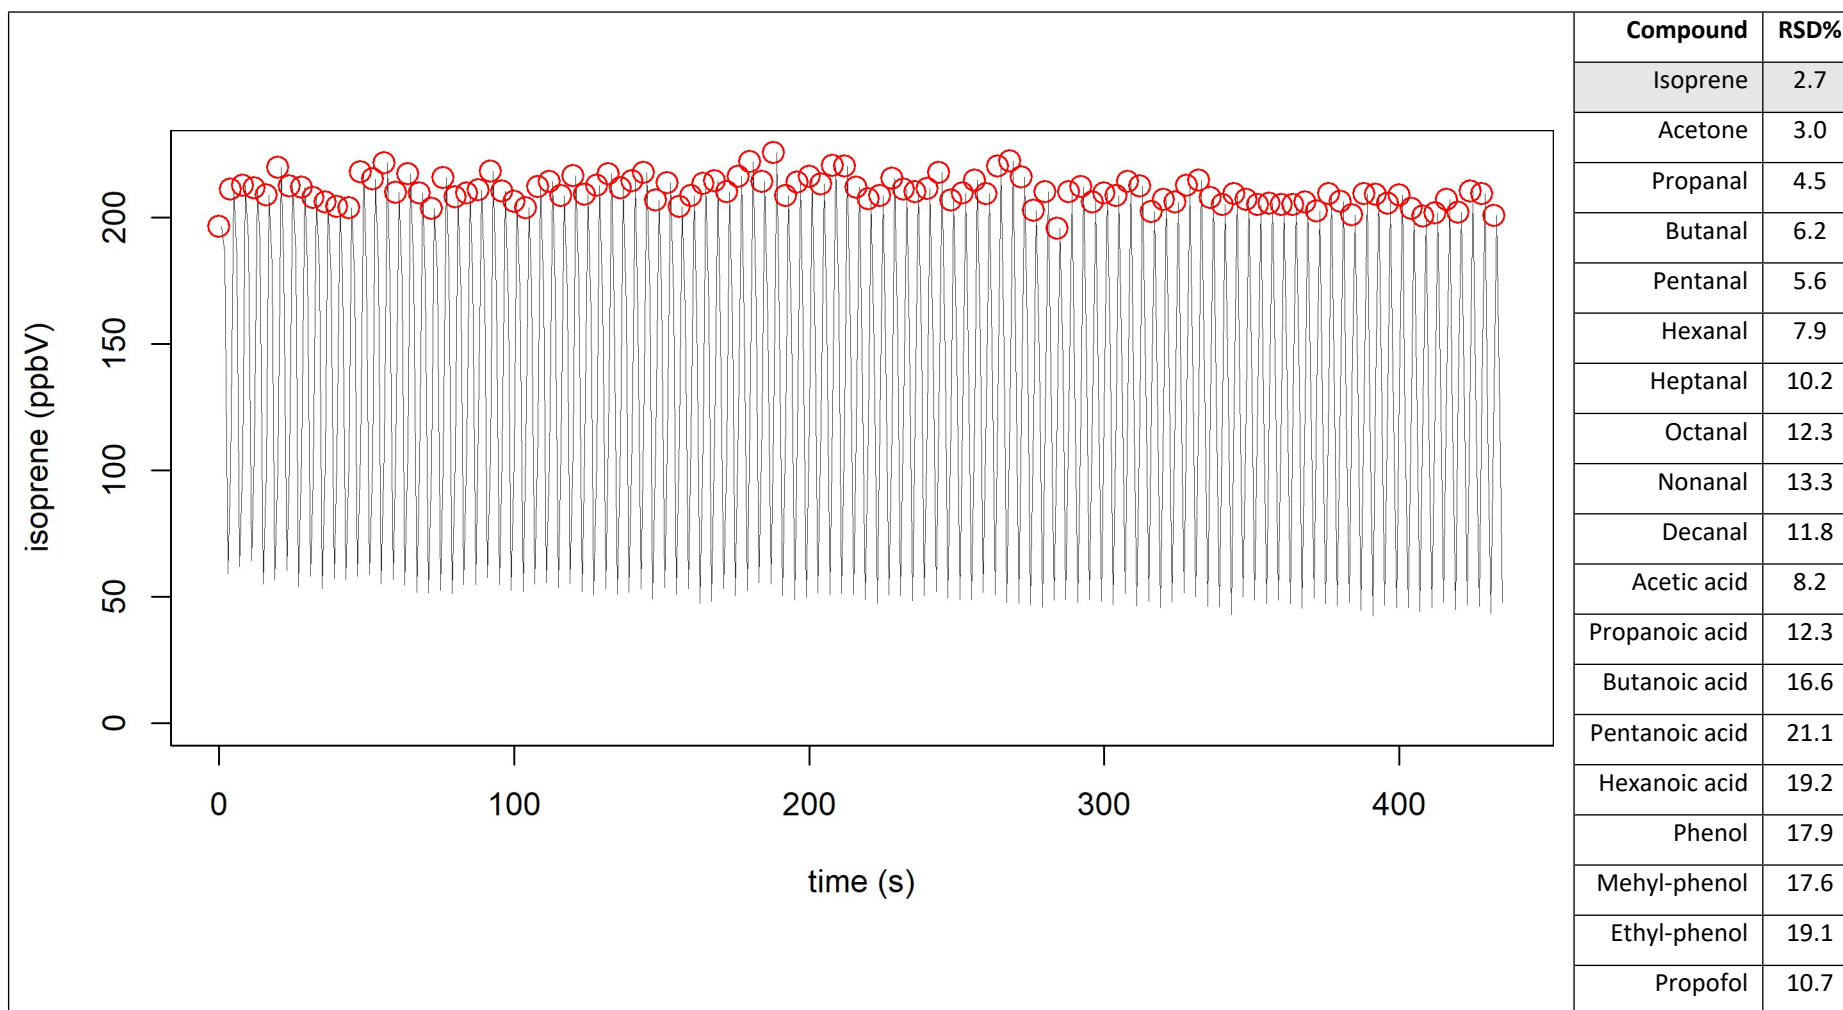

Supplement: d3an00786c1.pdf [file d3an00786c1.pdf]
