# Supplementary material for: Influence of ventilatory parameters on the concentration of exhaled volatile organic compounds in mechanically ventilated patients
Source: Royal Society of Chemistry journal article supplement (doi:10.1039/d3an00786c), 2023-01-01
Supplement: d3an00786c2.pdf [file d3an00786c2.pdf]

**Table S1.** VOC concentrations in the patients' exhaled breath and in the empty ventilator.

| Compound       | VOC concentrations in ppb : mean and IQR |                       | <i>p</i> -value <sup>1</sup> |
|----------------|------------------------------------------|-----------------------|------------------------------|
|                | Empty ventilator<br>(n = 16)             | Breath<br>(n = 20)    |                              |
| Isoprene       | 0.59 (0.57 – 0.64)                       | 167 (123 – 271)       | < 0.001                      |
| Acetone        | 9.8 (7.5 – 11.5)                         | 2,242 (1,357 – 3,854) | < 0.001                      |
| Propanal       | 3.9 (3.0 – 4.9)                          | 47 (33 – 67)          | < 0.001                      |
| Butanal        | 2.8 (1.9 – 3.7)                          | 22 (16 – 32)          | < 0.001                      |
| Pentanal       | 1.5 (1.2 – 2.5)                          | 21 (17 – 28)          | < 0.001                      |
| Hexanal        | 1.7 (1.3 – 2.2)                          | 9.5 (6.5 – 14.5)      | < 0.001                      |
| Heptanal       | 0.9 (0.8 – 1.4)                          | 5.3 (3.6 – 7.3)       | < 0.001                      |
| Octanal        | 2.0 (1.6 – 2.5)                          | 4.3 (2.8 – 6.4)       | < 0.001                      |
| Nonanal        | 1.4 (1.2 – 1.8)                          | 2.4 (1.8 – 3.7)       | 0.001                        |
| Decanal        | 1.3 (1.2 – 1.5)                          | 2.6 (1.8 – 3.9)       | < 0.001                      |
| Acetic acid    | 8.4 (7.1 – 13.9)                         | 18 (12 – 32)          | 0.005                        |
| Propanoic acid | 1.5 (1.1 – 1.8)                          | 3.3 (2.8 – 8.4)       | < 0.001                      |
| Butanoic acid  | 1.5 (1.2 – 2.8)                          | 2.7 (2.5 – 4.0)       | 0.012                        |
| Pentanoic acid | 0.7 (0.6 – 1.2)                          | 1.2 (1.1 – 1.3)       | 0.031                        |
| Hexanoic acid  | 0.8 (0.7 – 1.2)                          | 1.3 (1.1 – 2.0)       | < 0.001                      |
| Phenol         | 0.8 (0.7 – 1.2)                          | 1.3 (1.1 – 2.0)       | 0.006                        |
| Mann           | 1.1 (1.0 – 1.3)                          | 1.6 (1.4 – 1.8)       | < 0.001                      |
| Ethyl-phenol   | 0.6 (0.5 – 0.7)                          | 0.9 (0.8 – 1.1)       | 0.002                        |
| Propofol       | 0.30 (0.27 – 0.45)                       | 9.3 (5.8 – 16.7)      | < 0.001                      |

<sup>1</sup> Based on Mann – Whitney test for pairwise comparison
