# Supplementary material for: Influence of ventilatory parameters on the concentration of exhaled volatile organic compounds in mechanically ventilated patients
Source: Royal Society of Chemistry journal article supplement (doi:10.1039/d3an00786c), 2023-01-01
Supplement: d3an00786c3.pdf [file d3an00786c3.pdf]

Table S2 - Effect of respiratory rate (RR) on parameters extracted from breath profiles of selected compounds. Statistically significant differences are established by means of one-way ANOVA, followed by Tukey's post-hoc (letter notation highlights differences between conditions,  $p < 0.05$ )

| Compound       | Amplitude<br>RR=5min <sup>-1</sup> | RR=10min <sup>-1</sup>      | RR=15min <sup>-1</sup>       | RR=20min <sup>-1</sup>       | RR=25min <sup>-1</sup>      | RR=30min <sup>-1</sup>     | <i>p</i> -value |
|----------------|------------------------------------|-----------------------------|------------------------------|------------------------------|-----------------------------|----------------------------|-----------------|
| Isoprene       | 0,783 ± 0,165 <sup>d</sup>         | 0,763 ± 0,151 <sup>d</sup>  | 0,548 ± 0,180 <sup>c</sup>   | 0,357 ± 0,104 <sup>b</sup>   | 0,225 ± 0,087 <sup>ab</sup> | 0,177 ± 0,158 <sup>a</sup> | 0,000           |
| Acetone        | 0,639 ± 0,240 <sup>d</sup>         | 0,492 ± 0,304 <sup>cd</sup> | 0,367 ± 0,288 <sup>bc</sup>  | 0,237 ± 0,194 <sup>ab</sup>  | 0,176 ± 0,150 <sup>ab</sup> | 0,121 ± 0,138 <sup>a</sup> | 0,000           |
| Propanal       | 0,342 ± 0,195 <sup>c</sup>         | 0,295 ± 0,164 <sup>c</sup>  | 0,253 ± 0,145 <sup>bc</sup>  | 0,142 ± 0,089 <sup>ab</sup>  | 0,076 ± 0,056 <sup>a</sup>  | 0,063 ± 0,065 <sup>a</sup> | 0,000           |
| Butanal        | 0,157 ± 0,177 <sup>a</sup>         | 0,145 ± 0,178 <sup>a</sup>  | 0,154 ± 0,150 <sup>a</sup>   | 0,101 ± 0,096 <sup>a</sup>   | 0,052 ± 0,061 <sup>a</sup>  | 0,047 ± 0,060 <sup>a</sup> | 0,267           |
| Pentanal       | 0,133 ± 0,178 <sup>ab</sup>        | 0,157 ± 0,178 <sup>b</sup>  | 0,152 ± 0,157 <sup>b</sup>   | 0,070 ± 0,077 <sup>ab</sup>  | 0,035 ± 0,035 <sup>a</sup>  | 0,024 ± 0,036 <sup>a</sup> | 0,019           |
| Hexanal        | 0,203 ± 0,172 <sup>c</sup>         | 0,180 ± 0,147 <sup>bc</sup> | 0,104 ± 0,105 <sup>a,c</sup> | 0,096 ± 0,061 <sup>ab</sup>  | 0,045 ± 0,046 <sup>a</sup>  | 0,031 ± 0,047 <sup>a</sup> | 0,000           |
| Heptanal       | 0,113 ± 0,138 <sup>a</sup>         | 0,098 ± 0,098 <sup>a</sup>  | 0,081 ± 0,080 <sup>a</sup>   | 0,086 ± 0,075 <sup>a</sup>   | 0,029 ± 0,037 <sup>a</sup>  | 0,037 ± 0,059 <sup>a</sup> | 0,262           |
| Octanal        | 0,093 ± 0,098 <sup>a</sup>         | 0,088 ± 0,096 <sup>a</sup>  | 0,072 ± 0,082 <sup>a</sup>   | 0,044 ± 0,052 <sup>a</sup>   | 0,054 ± 0,056 <sup>a</sup>  | 0,049 ± 0,061 <sup>a</sup> | 1,000           |
| Nonanal        | 0,085 ± 0,084 <sup>a</sup>         | 0,072 ± 0,098 <sup>a</sup>  | 0,040 ± 0,062 <sup>a</sup>   | 0,052 ± 0,077 <sup>a</sup>   | 0,029 ± 0,054 <sup>a</sup>  | 0,021 ± 0,029 <sup>a</sup> | 0,770           |
| Decanal        | 0,058 ± 0,173 <sup>a</sup>         | 0,074 ± 0,138 <sup>a</sup>  | 0,051 ± 0,080 <sup>a</sup>   | 0,044 ± 0,062 <sup>a</sup>   | 0,035 ± 0,052 <sup>a</sup>  | 0,042 ± 0,062 <sup>a</sup> | 1,000           |
| Acetic acid    | 0,327 ± 0,209 <sup>c</sup>         | 0,313 ± 0,161 <sup>c</sup>  | 0,282 ± 0,158 <sup>bc</sup>  | 0,159 ± 0,145 <sup>ab</sup>  | 0,121 ± 0,102 <sup>a</sup>  | 0,080 ± 0,105 <sup>a</sup> | 0,000           |
| Propanoic acid | 0,218 ± 0,174 <sup>c</sup>         | 0,173 ± 0,186 <sup>bc</sup> | 0,169 ± 0,172 <sup>bc</sup>  | 0,111 ± 0,113 <sup>a,c</sup> | 0,063 ± 0,084 <sup>ab</sup> | 0,037 ± 0,056 <sup>a</sup> | 0,006           |
| Butanoic acid  | 0,128 ± 0,108 <sup>a</sup>         | 0,093 ± 0,114 <sup>a</sup>  | 0,081 ± 0,099 <sup>a</sup>   | 0,087 ± 0,084 <sup>a</sup>   | 0,052 ± 0,068 <sup>a</sup>  | 0,047 ± 0,055 <sup>a</sup> | 1,000           |
| Pentanoic acid | 0,114 ± 0,136 <sup>a</sup>         | 0,110 ± 0,129 <sup>a</sup>  | 0,086 ± 0,151 <sup>a</sup>   | 0,032 ± 0,066 <sup>a</sup>   | 0,070 ± 0,122 <sup>a</sup>  | 0,026 ± 0,054 <sup>a</sup> | 1,000           |
| Hexanoic acid  | 0,066 ± 0,116 <sup>a</sup>         | 0,150 ± 0,168 <sup>a</sup>  | 0,122 ± 0,170 <sup>a</sup>   | 0,081 ± 0,130 <sup>a</sup>   | 0,100 ± 0,159 <sup>a</sup>  | 0,096 ± 0,155 <sup>a</sup> | 1,000           |
| Phenol         | 0,139 ± 0,165 <sup>a</sup>         | 0,141 ± 0,161 <sup>a</sup>  | 0,072 ± 0,119 <sup>a</sup>   | 0,077 ± 0,070 <sup>a</sup>   | 0,038 ± 0,056 <sup>a</sup>  | 0,036 ± 0,053 <sup>a</sup> | 0,139           |
| Methyl-phenol  | 0,101 ± 0,113 <sup>a</sup>         | 0,091 ± 0,137 <sup>a</sup>  | 0,096 ± 0,113 <sup>a</sup>   | 0,043 ± 0,056 <sup>a</sup>   | 0,065 ± 0,097 <sup>a</sup>  | 0,042 ± 0,074 <sup>a</sup> | 1,000           |
| Ethyl-phenol   | 0,062 ± 0,105 <sup>a</sup>         | 0,150 ± 0,172 <sup>a</sup>  | 0,087 ± 0,109 <sup>a</sup>   | 0,105 ± 0,141 <sup>a</sup>   | 0,044 ± 0,058 <sup>a</sup>  | 0,091 ± 0,142 <sup>a</sup> | 1,000           |
| Propofol       | 0,074 ± 0,164 <sup>a</sup>         | 0,082 ± 0,157 <sup>a</sup>  | 0,087 ± 0,193 <sup>a</sup>   | 0,029 ± 0,043 <sup>a</sup>   | 0,064 ± 0,193 <sup>a</sup>  | 0,020 ± 0,054 <sup>a</sup> | 1,000           |

| Compound       | AUC<br>RR=5min <sup>-1</sup> | RR=10min <sup>-1</sup>       | RR=15min <sup>-1</sup>       | RR=20min <sup>-1</sup>        | RR=25min <sup>-1</sup>        | RR=30min <sup>-1</sup>       | <i>p</i> -value |
|----------------|------------------------------|------------------------------|------------------------------|-------------------------------|-------------------------------|------------------------------|-----------------|
| Isoprene       | 33,987 ± 5,971 <sup>b</sup>  | 28,243 ± 5,840 <sup>a</sup>  | 24,212 ± 6,003 <sup>a</sup>  | 24,135 ± 5,842 <sup>a</sup>   | 25,811 ± 5,862 <sup>a</sup>   | 26,373 ± 5,310 <sup>a</sup>  | 0,000           |
| Acetone        | 32,535 ± 4,846 <sup>c</sup>  | 26,082 ± 5,907 <sup>ab</sup> | 24,886 ± 5,916 <sup>a</sup>  | 27,557 ± 5,305 <sup>a,c</sup> | 30,201 ± 7,674 <sup>a,c</sup> | 31,586 ± 7,420 <sup>bc</sup> | 0,008           |
| Propanal       | 31,171 ± 9,592 <sup>b</sup>  | 27,648 ± 8,926 <sup>ab</sup> | 21,752 ± 7,016 <sup>a</sup>  | 21,955 ± 7,274 <sup>a</sup>   | 26,401 ± 6,879 <sup>ab</sup>  | 31,994 ± 8,639 <sup>b</sup>  | 0,002           |
| Butanal        | 30,435 ± 9,316 <sup>ab</sup> | 28,447 ± 8,521 <sup>ab</sup> | 23,349 ± 6,623 <sup>a</sup>  | 23,816 ± 8,244 <sup>a</sup>   | 28,691 ± 7,639 <sup>ab</sup>  | 35,257 ± 8,928 <sup>b</sup>  | 0,002           |
| Pentanal       | 28,019 ± 9,372 <sup>b</sup>  | 27,151 ± 8,081 <sup>ab</sup> | 20,704 ± 6,690 <sup>a</sup>  | 22,053 ± 7,477 <sup>ab</sup>  | 28,538 ± 6,620 <sup>b</sup>   | 36,147 ± 7,248 <sup>c</sup>  | 0,000           |
| Hexanal        | 28,894 ± 6,551 <sup>c</sup>  | 26,780 ± 6,556 <sup>bc</sup> | 21,743 ± 5,209 <sup>ab</sup> | 20,843 ± 4,539 <sup>a</sup>   | 21,306 ± 5,699 <sup>ab</sup>  | 22,412 ± 8,048 <sup>ab</sup> | 0,002           |
| Heptanal       | 26,241 ± 5,753 <sup>a</sup>  | 25,473 ± 5,441 <sup>a</sup>  | 22,658 ± 4,370 <sup>a</sup>  | 23,552 ± 5,409 <sup>a</sup>   | 25,709 ± 5,586 <sup>a</sup>   | 28,593 ± 4,178 <sup>a</sup>  | 0,154           |
| Octanal        | 30,008 ± 5,953 <sup>a</sup>  | 28,435 ± 5,689 <sup>a</sup>  | 27,067 ± 6,182 <sup>a</sup>  | 26,626 ± 5,964 <sup>a</sup>   | 27,527 ± 7,176 <sup>a</sup>   | 27,899 ± 6,881 <sup>a</sup>  | 1,000           |
| Nonanal        | 33,309 ± 4,122 <sup>a</sup>  | 33,132 ± 2,977 <sup>a</sup>  | 31,163 ± 4,242 <sup>a</sup>  | 31,281 ± 4,103 <sup>a</sup>   | 31,431 ± 3,040 <sup>a</sup>   | 30,862 ± 3,835 <sup>a</sup>  | 1,000           |
| Decanal        | 30,507 ± 5,176 <sup>a</sup>  | 30,816 ± 5,398 <sup>a</sup>  | 29,102 ± 5,874 <sup>a</sup>  | 29,779 ± 5,805 <sup>a</sup>   | 31,490 ± 6,000 <sup>a</sup>   | 32,831 ± 6,659 <sup>a</sup>  | 1,000           |
| Acetic acid    | 27,936 ± 4,283 <sup>b</sup>  | 23,057 ± 4,222 <sup>a</sup>  | 22,001 ± 3,910 <sup>a</sup>  | 23,423 ± 3,040 <sup>a</sup>   | 23,913 ± 3,747 <sup>a</sup>   | 23,926 ± 3,287 <sup>a</sup>  | 0,002           |
| Propanoic acid | 28,587 ± 7,748 <sup>a</sup>  | 24,756 ± 7,042 <sup>a</sup>  | 23,041 ± 6,726 <sup>a</sup>  | 22,287 ± 6,042 <sup>a</sup>   | 23,565 ± 6,556 <sup>a</sup>   | 22,880 ± 6,445 <sup>a</sup>  | 0,902           |
| Butanoic acid  | 28,481 ± 5,452 <sup>a</sup>  | 25,738 ± 4,953 <sup>a</sup>  | 23,160 ± 5,291 <sup>a</sup>  | 23,333 ± 6,190 <sup>a</sup>   | 23,198 ± 5,756 <sup>a</sup>   | 22,000 ± 4,923 <sup>a</sup>  | 0,059           |
| Pentanoic acid | 18,128 ± 6,664 <sup>a</sup>  | 16,882 ± 6,834 <sup>a</sup>  | 16,783 ± 7,371 <sup>a</sup>  | 16,650 ± 6,795 <sup>a</sup>   | 16,022 ± 5,908 <sup>a</sup>   | 15,075 ± 4,648 <sup>a</sup>  | 1,000           |
| Hexanoic acid  | 19,763 ± 7,802 <sup>a</sup>  | 18,769 ± 8,195 <sup>a</sup>  | 17,628 ± 8,033 <sup>a</sup>  | 17,328 ± 7,657 <sup>a</sup>   | 16,451 ± 7,017 <sup>a</sup>   | 15,532 ± 6,106 <sup>a</sup>  | 1,000           |
| Phenol         | 25,048 ± 4,133 <sup>a</sup>  | 23,416 ± 3,821 <sup>a</sup>  | 23,555 ± 3,974 <sup>a</sup>  | 23,201 ± 3,466 <sup>a</sup>   | 22,151 ± 4,118 <sup>a</sup>   | 22,765 ± 3,792 <sup>a</sup>  | 1,000           |
| Methyl-phenol  | 29,435 ± 7,453 <sup>a</sup>  | 26,130 ± 5,822 <sup>a</sup>  | 24,796 ± 5,887 <sup>a</sup>  | 24,079 ± 6,116 <sup>a</sup>   | 24,285 ± 5,018 <sup>a</sup>   | 24,157 ± 5,800 <sup>a</sup>  | 0,843           |
| Ethyl-phenol   | 18,321 ± 5,764 <sup>a</sup>  | 17,720 ± 5,880 <sup>a</sup>  | 17,098 ± 6,195 <sup>a</sup>  | 16,913 ± 6,676 <sup>a</sup>   | 17,083 ± 6,234 <sup>a</sup>   | 16,599 ± 7,106 <sup>a</sup>  | 1,000           |
| Propofol       | 27,828 ± 13,267 <sup>a</sup> | 28,587 ± 11,407 <sup>a</sup> | 28,944 ± 11,129 <sup>a</sup> | 30,017 ± 11,920 <sup>a</sup>  | 31,517 ± 11,175 <sup>a</sup>  | 32,315 ± 12,025 <sup>a</sup> | 1,000           |

| Compound       | Maximum<br>RR=5min <sup>-1</sup> | RR=10min <sup>-1</sup>      | RR=15min <sup>-1</sup>       | RR=20min <sup>-1</sup>       | RR=25min <sup>-1</sup>      | RR=30min <sup>-1</sup>       | <i>p</i> -value |
|----------------|----------------------------------|-----------------------------|------------------------------|------------------------------|-----------------------------|------------------------------|-----------------|
| Isoprene       | 0,868 ± 0,115 <sup>c</sup>       | 0,817 ± 0,109 <sup>c</sup>  | 0,651 ± 0,141 <sup>b</sup>   | 0,575 ± 0,103 <sup>ab</sup>  | 0,556 ± 0,119 <sup>ab</sup> | 0,538 ± 0,109 <sup>a</sup>   | 0,000           |
| Acetone        | 0,792 ± 0,157 <sup>b</sup>       | 0,683 ± 0,181 <sup>ab</sup> | 0,578 ± 0,213 <sup>a</sup>   | 0,580 ± 0,141 <sup>a</sup>   | 0,604 ± 0,150 <sup>a</sup>  | 0,600 ± 0,143 <sup>a</sup>   | 0,005           |
| Propanal       | 0,686 ± 0,206 <sup>c</sup>       | 0,601 ± 0,206 <sup>bc</sup> | 0,483 ± 0,152 <sup>ab</sup>  | 0,445 ± 0,126 <sup>a</sup>   | 0,496 ± 0,108 <sup>ab</sup> | 0,574 ± 0,147 <sup>a,c</sup> | 0,001           |
| Butanal        | 0,574 ± 0,215 <sup>a</sup>       | 0,542 ± 0,184 <sup>a</sup>  | 0,459 ± 0,138 <sup>a</sup>   | 0,451 ± 0,138 <sup>a</sup>   | 0,508 ± 0,147 <sup>a</sup>  | 0,606 ± 0,161 <sup>a</sup>   | 0,372           |
| Pentanal       | 0,492 ± 0,228 <sup>ab</sup>      | 0,522 ± 0,176 <sup>ab</sup> | 0,420 ± 0,149 <sup>a</sup>   | 0,404 ± 0,132 <sup>a</sup>   | 0,489 ± 0,134 <sup>ab</sup> | 0,614 ± 0,130 <sup>b</sup>   | 0,021           |
| Hexanal        | 0,560 ± 0,154 <sup>b</sup>       | 0,539 ± 0,145 <sup>b</sup>  | 0,414 ± 0,110 <sup>a</sup>   | 0,403 ± 0,100 <sup>a</sup>   | 0,388 ± 0,114 <sup>a</sup>  | 0,392 ± 0,131 <sup>a</sup>   | 0,000           |
| Heptanal       | 0,465 ± 0,133 <sup>a</sup>       | 0,476 ± 0,120 <sup>a</sup>  | 0,397 ± 0,087 <sup>a</sup>   | 0,435 ± 0,085 <sup>a</sup>   | 0,439 ± 0,107 <sup>a</sup>  | 0,495 ± 0,082 <sup>a</sup>   | 1,000           |
| Octanal        | 0,531 ± 0,131 <sup>a</sup>       | 0,512 ± 0,110 <sup>a</sup>  | 0,471 ± 0,128 <sup>a</sup>   | 0,476 ± 0,106 <sup>a</sup>   | 0,485 ± 0,164 <sup>a</sup>  | 0,488 ± 0,115 <sup>a</sup>   | 1,000           |
| Nonanal        | 0,600 ± 0,105 <sup>a</sup>       | 0,624 ± 0,100 <sup>a</sup>  | 0,571 ± 0,081 <sup>a</sup>   | 0,557 ± 0,084 <sup>a</sup>   | 0,567 ± 0,076 <sup>a</sup>  | 0,544 ± 0,085 <sup>a</sup>   | 1,000           |
| Decanal        | 0,536 ± 0,141 <sup>a</sup>       | 0,552 ± 0,120 <sup>a</sup>  | 0,515 ± 0,153 <sup>a</sup>   | 0,537 ± 0,158 <sup>a</sup>   | 0,580 ± 0,151 <sup>a</sup>  | 0,628 ± 0,100 <sup>a</sup>   | 1,000           |
| Acetic acid    | 0,569 ± 0,135 <sup>c</sup>       | 0,540 ± 0,124 <sup>bc</sup> | 0,495 ± 0,116 <sup>a,c</sup> | 0,467 ± 0,098 <sup>a,c</sup> | 0,461 ± 0,102 <sup>ab</sup> | 0,433 ± 0,098 <sup>a</sup>   | 0,032           |
| Propanoic acid | 0,550 ± 0,177 <sup>a</sup>       | 0,477 ± 0,169 <sup>a</sup>  | 0,463 ± 0,163 <sup>a</sup>   | 0,426 ± 0,120 <sup>a</sup>   | 0,420 ± 0,124 <sup>a</sup>  | 0,394 ± 0,107 <sup>a</sup>   | 0,328           |
| Butanoic acid  | 0,546 ± 0,134 <sup>a</sup>       | 0,483 ± 0,129 <sup>a</sup>  | 0,418 ± 0,145 <sup>a</sup>   | 0,435 ± 0,111 <sup>a</sup>   | 0,417 ± 0,114 <sup>a</sup>  | 0,407 ± 0,106 <sup>a</sup>   | 0,063           |
| Pentanoic acid | 0,341 ± 0,161 <sup>a</sup>       | 0,289 ± 0,180 <sup>a</sup>  | 0,281 ± 0,190 <sup>a</sup>   | 0,221 ± 0,196 <sup>a</sup>   | 0,256 ± 0,153 <sup>a</sup>  | 0,208 ± 0,165 <sup>a</sup>   | 1,000           |
| Hexanoic acid  | 0,336 ± 0,224 <sup>a</sup>       | 0,326 ± 0,213 <sup>a</sup>  | 0,297 ± 0,214 <sup>a</sup>   | 0,289 ± 0,207 <sup>a</sup>   | 0,268 ± 0,219 <sup>a</sup>  | 0,274 ± 0,161 <sup>a</sup>   | 1,000           |
| Phenol         | 0,445 ± 0,131 <sup>a</sup>       | 0,470 ± 0,114 <sup>a</sup>  | 0,413 ± 0,155 <sup>a</sup>   | 0,414 ± 0,115 <sup>a</sup>   | 0,383 ± 0,117 <sup>a</sup>  | 0,413 ± 0,075 <sup>a</sup>   | 1,000           |
| Methyl-phenol  | 0,541 ± 0,153 <sup>a</sup>       | 0,454 ± 0,182 <sup>a</sup>  | 0,471 ± 0,091 <sup>a</sup>   | 0,407 ± 0,167 <sup>a</sup>   | 0,434 ± 0,132 <sup>a</sup>  | 0,425 ± 0,126 <sup>a</sup>   | 1,000           |
| Ethyl-phenol   | 0,283 ± 0,216 <sup>a</sup>       | 0,342 ± 0,133 <sup>a</sup>  | 0,298 ± 0,191 <sup>a</sup>   | 0,307 ± 0,184 <sup>a</sup>   | 0,287 ± 0,192 <sup>a</sup>  | 0,306 ± 0,157 <sup>a</sup>   | 1,000           |
| Propofol       | 0,523 ± 0,293 <sup>a</sup>       | 0,528 ± 0,262 <sup>a</sup>  | 0,511 ± 0,283 <sup>a</sup>   | 0,539 ± 0,271 <sup>a</sup>   | 0,609 ± 0,231 <sup>a</sup>  | 0,589 ± 0,259 <sup>a</sup>   | 1,000           |

| Compound       | Minimum<br>RR=5min <sup>-1</sup> | RR=10min <sup>-1</sup>       | RR=15min <sup>-1</sup>      | RR=20min <sup>-1</sup>      | RR=25min <sup>-1</sup>      | RR=30min <sup>-1</sup>     | <i>p</i> -value |
|----------------|----------------------------------|------------------------------|-----------------------------|-----------------------------|-----------------------------|----------------------------|-----------------|
| Isoprene       | 0,085 ± 0,140 <sup>a</sup>       | 0,054 ± 0,125 <sup>a</sup>   | 0,103 ± 0,151 <sup>ab</sup> | 0,218 ± 0,140 <sup>bc</sup> | 0,331 ± 0,107 <sup>cd</sup> | 0,361 ± 0,131 <sup>d</sup> | 0,000           |
| Acetone        | 0,154 ± 0,116 <sup>a</sup>       | 0,191 ± 0,156 <sup>a</sup>   | 0,217 ± 0,134 <sup>ab</sup> | 0,343 ± 0,148 <sup>bc</sup> | 0,428 ± 0,153 <sup>cd</sup> | 0,480 ± 0,148 <sup>d</sup> | 0,000           |
| Propanal       | 0,344 ± 0,176 <sup>ab</sup>      | 0,310 ± 0,164 <sup>ab</sup>  | 0,235 ± 0,161 <sup>a</sup>  | 0,309 ± 0,143 <sup>ab</sup> | 0,428 ± 0,135 <sup>bc</sup> | 0,520 ± 0,168 <sup>c</sup> | 0,000           |
| Butanal        | 0,444 ± 0,206 <sup>a,c</sup>     | 0,413 ± 0,189 <sup>ab</sup>  | 0,314 ± 0,157 <sup>a</sup>  | 0,365 ± 0,165 <sup>ab</sup> | 0,479 ± 0,136 <sup>bc</sup> | 0,590 ± 0,179 <sup>c</sup> | 0,001           |
| Pentanal       | 0,409 ± 0,179 <sup>ab</sup>      | 0,379 ± 0,182 <sup>ab</sup>  | 0,281 ± 0,157 <sup>a</sup>  | 0,353 ± 0,147 <sup>ab</sup> | 0,482 ± 0,126 <sup>bc</sup> | 0,620 ± 0,133 <sup>c</sup> | 0,000           |
| Hexanal        | 0,360 ± 0,141 <sup>a</sup>       | 0,359 ± 0,142 <sup>a</sup>   | 0,315 ± 0,131 <sup>a</sup>  | 0,308 ± 0,074 <sup>a</sup>  | 0,352 ± 0,103 <sup>a</sup>  | 0,379 ± 0,149 <sup>a</sup> | 1,000           |
| Heptanal       | 0,389 ± 0,142 <sup>a,c</sup>     | 0,388 ± 0,126 <sup>a,c</sup> | 0,338 ± 0,084 <sup>a</sup>  | 0,359 ± 0,121 <sup>ab</sup> | 0,445 ± 0,114 <sup>bc</sup> | 0,482 ± 0,096 <sup>c</sup> | 0,021           |
| Octanal        | 0,461 ± 0,146 <sup>a</sup>       | 0,461 ± 0,140 <sup>a</sup>   | 0,429 ± 0,118 <sup>a</sup>  | 0,444 ± 0,104 <sup>a</sup>  | 0,446 ± 0,109 <sup>a</sup>  | 0,468 ± 0,126 <sup>a</sup> | 1,000           |
| Nonanal        | 0,537 ± 0,100 <sup>a</sup>       | 0,576 ± 0,117 <sup>a</sup>   | 0,552 ± 0,095 <sup>a</sup>  | 0,531 ± 0,110 <sup>a</sup>  | 0,557 ± 0,079 <sup>a</sup>  | 0,544 ± 0,061 <sup>a</sup> | 1,000           |
| Decanal        | 0,553 ± 0,152 <sup>a</sup>       | 0,524 ± 0,174 <sup>a</sup>   | 0,526 ± 0,093 <sup>a</sup>  | 0,536 ± 0,141 <sup>a</sup>  | 0,563 ± 0,149 <sup>a</sup>  | 0,602 ± 0,097 <sup>a</sup> | 1,000           |
| Acetic acid    | 0,242 ± 0,109 <sup>ab</sup>      | 0,228 ± 0,105 <sup>ab</sup>  | 0,213 ± 0,090 <sup>a</sup>  | 0,311 ± 0,102 <sup>bc</sup> | 0,344 ± 0,072 <sup>c</sup>  | 0,363 ± 0,063 <sup>c</sup> | 0,000           |
| Propanoic acid | 0,347 ± 0,167 <sup>a</sup>       | 0,317 ± 0,138 <sup>a</sup>   | 0,303 ± 0,139 <sup>a</sup>  | 0,319 ± 0,119 <sup>a</sup>  | 0,362 ± 0,120 <sup>a</sup>  | 0,371 ± 0,125 <sup>a</sup> | 1,000           |
| Butanoic acid  | 0,430 ± 0,117 <sup>a</sup>       | 0,418 ± 0,106 <sup>a</sup>   | 0,363 ± 0,079 <sup>a</sup>  | 0,361 ± 0,099 <sup>a</sup>  | 0,381 ± 0,102 <sup>a</sup>  | 0,369 ± 0,084 <sup>a</sup> | 1,000           |
| Pentanoic acid | 0,275 ± 0,210 <sup>a</sup>       | 0,245 ± 0,206 <sup>a</sup>   | 0,273 ± 0,188 <sup>a</sup>  | 0,296 ± 0,154 <sup>a</sup>  | 0,239 ± 0,172 <sup>a</sup>  | 0,252 ± 0,121 <sup>a</sup> | 1,000           |
| Hexanoic acid  | 0,361 ± 0,231 <sup>a</sup>       | 0,238 ± 0,214 <sup>a</sup>   | 0,206 ± 0,193 <sup>a</sup>  | 0,262 ± 0,201 <sup>a</sup>  | 0,227 ± 0,189 <sup>a</sup>  | 0,203 ± 0,181 <sup>a</sup> | 1,000           |
| Phenol         | 0,332 ± 0,165 <sup>a</sup>       | 0,345 ± 0,120 <sup>a</sup>   | 0,377 ± 0,142 <sup>a</sup>  | 0,360 ± 0,086 <sup>a</sup>  | 0,398 ± 0,077 <sup>a</sup>  | 0,394 ± 0,059 <sup>a</sup> |                 |
