# Supplementary material for: Influence of ventilatory parameters on the concentration of exhaled volatile organic compounds in mechanically ventilated patients
Source: Royal Society of Chemistry journal article supplement (doi:10.1039/d3an00786c), 2023-01-01
Supplement: d3an00786c4.pdf [file d3an00786c4.pdf]

Table S3 - Effect of tidal volume (TV) on parameters extracted from breath profiles of selected compounds. Statistically significant differences are established by means of one-way ANOVA, followed by Tukey's post-hoc (letter notation highlights differences between conditions,  $p < 0.05$ )

| Compound       | Amplitude                  |                            |                             |                            | $p$ -value |
|----------------|----------------------------|----------------------------|-----------------------------|----------------------------|------------|
|                | TV=6mL kg <sup>-1</sup>    | TV=8mL kg <sup>-1</sup>    | TV=10mL kg <sup>-1</sup>    | TV=12mL kg <sup>-1</sup>   |            |
| Isoprene       | 0,615 ± 0,169 <sup>b</sup> | 0,583 ± 0,170 <sup>b</sup> | 0,492 ± 0,141 <sup>ab</sup> | 0,420 ± 0,145 <sup>a</sup> | 0,013      |
| Acetone        | 0,316 ± 0,232 <sup>a</sup> | 0,288 ± 0,236 <sup>a</sup> | 0,274 ± 0,236 <sup>a</sup>  | 0,262 ± 0,216 <sup>a</sup> | 1,000      |
| Propanal       | 0,237 ± 0,149 <sup>a</sup> | 0,245 ± 0,155 <sup>a</sup> | 0,180 ± 0,123 <sup>a</sup>  | 0,152 ± 0,128 <sup>a</sup> | 1,000      |
| Butanal        | 0,117 ± 0,133 <sup>a</sup> | 0,106 ± 0,134 <sup>a</sup> | 0,098 ± 0,104 <sup>a</sup>  | 0,067 ± 0,103 <sup>a</sup> | 1,000      |
| Pentanal       | 0,118 ± 0,130 <sup>a</sup> | 0,113 ± 0,127 <sup>a</sup> | 0,105 ± 0,107 <sup>a</sup>  | 0,082 ± 0,109 <sup>a</sup> | 1,000      |
| Hexanal        | 0,109 ± 0,093 <sup>a</sup> | 0,136 ± 0,087 <sup>a</sup> | 0,102 ± 0,069 <sup>a</sup>  | 0,109 ± 0,071 <sup>a</sup> | 1,000      |
| Heptanal       | 0,057 ± 0,066 <sup>a</sup> | 0,085 ± 0,074 <sup>a</sup> | 0,085 ± 0,067 <sup>a</sup>  | 0,067 ± 0,068 <sup>a</sup> | 1,000      |
| Octanal        | 0,070 ± 0,071 <sup>a</sup> | 0,074 ± 0,104 <sup>a</sup> | 0,075 ± 0,084 <sup>a</sup>  | 0,052 ± 0,047 <sup>a</sup> | 1,000      |
| Nonanal        | 0,051 ± 0,090 <sup>a</sup> | 0,042 ± 0,067 <sup>a</sup> | 0,044 ± 0,046 <sup>a</sup>  | 0,041 ± 0,046 <sup>a</sup> | 1,000      |
| Decanal        | 0,058 ± 0,101 <sup>a</sup> | 0,058 ± 0,142 <sup>a</sup> | 0,041 ± 0,059 <sup>a</sup>  | 0,052 ± 0,065 <sup>a</sup> | 1,000      |
| Acetic acid    | 0,199 ± 0,134 <sup>a</sup> | 0,176 ± 0,134 <sup>a</sup> | 0,221 ± 0,141 <sup>a</sup>  | 0,167 ± 0,134 <sup>a</sup> | 1,000      |
| Propanoic acid | 0,091 ± 0,096 <sup>a</sup> | 0,094 ± 0,109 <sup>a</sup> | 0,071 ± 0,112 <sup>a</sup>  | 0,087 ± 0,109 <sup>a</sup> | 1,000      |
| Butanoic acid  | 0,054 ± 0,053 <sup>a</sup> | 0,103 ± 0,097 <sup>a</sup> | 0,087 ± 0,089 <sup>a</sup>  | 0,079 ± 0,081 <sup>a</sup> | 1,000      |
| Pentanoic acid | 0,105 ± 0,157 <sup>a</sup> | 0,080 ± 0,115 <sup>a</sup> | 0,039 ± 0,080 <sup>a</sup>  | 0,095 ± 0,156 <sup>a</sup> | 1,000      |
| Hexanoic acid  | 0,097 ± 0,154 <sup>a</sup> | 0,069 ± 0,104 <sup>a</sup> | 0,096 ± 0,114 <sup>a</sup>  | 0,086 ± 0,154 <sup>a</sup> | 1,000      |
| Phenol         | 0,092 ± 0,122 <sup>a</sup> | 0,072 ± 0,103 <sup>a</sup> | 0,090 ± 0,107 <sup>a</sup>  | 0,081 ± 0,115 <sup>a</sup> | 1,000      |
| Methyl-phenol  | 0,045 ± 0,045 <sup>a</sup> | 0,077 ± 0,100 <sup>a</sup> | 0,070 ± 0,101 <sup>a</sup>  | 0,046 ± 0,059 <sup>a</sup> | 1,000      |
| Ethyl-phenol   | 0,060 ± 0,086 <sup>a</sup> | 0,068 ± 0,151 <sup>a</sup> | 0,094 ± 0,135 <sup>a</sup>  | 0,125 ± 0,149 <sup>a</sup> | 1,000      |
| Propofol       | 0,075 ± 0,155 <sup>a</sup> | 0,014 ± 0,028 <sup>a</sup> | 0,042 ± 0,064 <sup>a</sup>  | 0,022 ± 0,033 <sup>a</sup> | 1,000      |

| Compound       | AUC                         |                             |                             |                             | $p$ -value |
|----------------|-----------------------------|-----------------------------|-----------------------------|-----------------------------|------------|
|                | TV=6mL kg <sup>-1</sup>     | TV=8mL kg <sup>-1</sup>     | TV=10mL kg <sup>-1</sup>    | TV=12mL kg <sup>-1</sup>    |            |
| Isoprene       | 26,465 ± 7,577 <sup>a</sup> | 26,519 ± 8,020 <sup>a</sup> | 25,947 ± 8,539 <sup>a</sup> | 25,708 ± 8,847 <sup>a</sup> | 1,000      |
| Acetone        | 12,697 ± 6,238 <sup>a</sup> | 13,405 ± 8,765 <sup>a</sup> | 12,822 ± 9,082 <sup>a</sup> | 12,538 ± 8,591 <sup>a</sup> | 1,000      |
| Propanal       | 26,990 ± 6,717 <sup>a</sup> | 25,805 ± 7,214 <sup>a</sup> | 25,807 ± 7,044 <sup>a</sup> | 25,821 ± 7,993 <sup>a</sup> | 1,000      |
| Butanal        | 27,891 ± 6,089 <sup>a</sup> | 27,087 ± 5,391 <sup>a</sup> | 26,514 ± 6,318 <sup>a</sup> | 26,684 ± 7,211 <sup>a</sup> | 1,000      |
| Pentanal       | 22,571 ± 5,529 <sup>a</sup> | 21,281 ± 5,166 <sup>a</sup> | 21,603 ± 6,023 <sup>a</sup> | 21,881 ± 6,646 <sup>a</sup> | 1,000      |
| Hexanal        | 21,165 ± 6,947 <sup>a</sup> | 22,087 ± 6,970 <sup>a</sup> | 18,911 ± 6,862 <sup>a</sup> | 17,327 ± 7,088 <sup>a</sup> | 1,000      |
| Heptanal       | 27,063 ± 5,544 <sup>a</sup> | 26,171 ± 4,923 <sup>a</sup> | 26,149 ± 5,113 <sup>a</sup> | 26,294 ± 6,169 <sup>a</sup> | 1,000      |
| Octanal        | 27,978 ± 4,512 <sup>a</sup> | 26,552 ± 4,136 <sup>a</sup> | 26,817 ± 3,935 <sup>a</sup> | 26,646 ± 4,846 <sup>a</sup> | 1,000      |
| Nonanal        | 23,320 ± 4,611 <sup>a</sup> | 22,087 ± 4,273 <sup>a</sup> | 22,307 ± 4,815 <sup>a</sup> | 23,143 ± 5,464 <sup>a</sup> | 1,000      |
| Decanal        | 24,642 ± 4,166 <sup>a</sup> | 23,326 ± 4,518 <sup>a</sup> | 24,689 ± 4,155 <sup>a</sup> | 25,224 ± 2,979 <sup>a</sup> | 1,000      |
| Acetic acid    | 28,897 ± 4,563 <sup>a</sup> | 27,530 ± 5,054 <sup>a</sup> | 28,174 ± 5,688 <sup>a</sup> | 29,035 ± 5,908 <sup>a</sup> | 1,000      |
| Propanoic acid | 14,485 ± 4,238 <sup>a</sup> | 14,131 ± 5,658 <sup>a</sup> | 13,466 ± 5,841 <sup>a</sup> | 15,182 ± 4,571 <sup>a</sup> | 1,000      |
| Butanoic acid  | 20,328 ± 6,661 <sup>a</sup> | 19,730 ± 6,576 <sup>a</sup> | 20,504 ± 6,933 <sup>a</sup> | 20,604 ± 8,155 <sup>a</sup> | 1,000      |
| Pentanoic acid | 19,110 ± 6,711 <sup>a</sup> | 19,212 ± 6,993 <sup>a</sup> | 21,955 ± 7,877 <sup>a</sup> | 22,354 ± 7,925 <sup>a</sup> | 1,000      |
| Hexanoic acid  | 13,885 ± 5,319 <sup>a</sup> | 12,859 ± 6,007 <sup>a</sup> | 14,163 ± 5,786 <sup>a</sup> | 14,205 ± 6,567 <sup>a</sup> | 1,000      |
| Phenol         | 22,556 ± 6,278 <sup>a</sup> | 21,659 ± 6,368 <sup>a</sup> | 23,023 ± 6,280 <sup>a</sup> | 24,256 ± 6,263 <sup>a</sup> | 1,000      |
| Methyl-phenol  | 20,997 ± 7,592 <sup>a</sup> | 21,130 ± 6,792 <sup>a</sup> | 20,258 ± 6,876 <sup>a</sup> | 19,938 ± 7,413 <sup>a</sup> | 1,000      |
| Ethyl-phenol   | 18,156 ± 7,640 <sup>a</sup> | 17,301 ± 6,757 <sup>a</sup> | 17,143 ± 7,153 <sup>a</sup> | 16,943 ± 7,562 <sup>a</sup> | 1,000      |
| Propofol       | 15,081 ± 6,120 <sup>a</sup> | 13,974 ± 6,384 <sup>a</sup> | 15,325 ± 6,011 <sup>a</sup> | 15,888 ± 3,779 <sup>a</sup> | 1,000      |

| Compound       | Maximum                    |                            |                            |                            | $p$ -value |
|----------------|----------------------------|----------------------------|----------------------------|----------------------------|------------|
|                | TV=6mL kg <sup>-1</sup>    | TV=8mL kg <sup>-1</sup>    | TV=10mL kg <sup>-1</sup>   | TV=12mL kg <sup>-1</sup>   |            |
| Isoprene       | 0,630 ± 0,163 <sup>a</sup> | 0,612 ± 0,130 <sup>a</sup> | 0,562 ± 0,116 <sup>a</sup> | 0,545 ± 0,121 <sup>a</sup> | 1,000      |
| Acetone        | 0,184 ± 0,153 <sup>a</sup> | 0,219 ± 0,181 <sup>a</sup> | 0,179 ± 0,173 <sup>a</sup> | 0,209 ± 0,177 <sup>a</sup> | 1,000      |
| Propanal       | 0,630 ± 0,148 <sup>a</sup> | 0,589 ± 0,144 <sup>a</sup> | 0,572 ± 0,127 <sup>a</sup> | 0,571 ± 0,152 <sup>a</sup> | 1,000      |
| Butanal        | 0,598 ± 0,126 <sup>a</sup> | 0,595 ± 0,125 <sup>a</sup> | 0,557 ± 0,115 <sup>a</sup> | 0,542 ± 0,132 <sup>a</sup> | 1,000      |
| Pentanal       | 0,441 ± 0,112 <sup>a</sup> | 0,452 ± 0,102 <sup>a</sup> | 0,429 ± 0,124 <sup>a</sup> | 0,430 ± 0,125 <sup>a</sup> | 1,000      |
| Hexanal        | 0,462 ± 0,163 <sup>a</sup> | 0,440 ± 0,145 <sup>a</sup> | 0,399 ± 0,139 <sup>a</sup> | 0,372 ± 0,139 <sup>a</sup> | 1,000      |
| Heptanal       | 0,462 ± 0,111 <sup>a</sup> | 0,454 ± 0,095 <sup>a</sup> | 0,435 ± 0,084 <sup>a</sup> | 0,441 ± 0,140 <sup>a</sup> | 1,000      |
| Octanal        | 0,462 ± 0,110 <sup>a</sup> | 0,476 ± 0,112 <sup>a</sup> | 0,464 ± 0,099 <sup>a</sup> | 0,447 ± 0,141 <sup>a</sup> | 1,000      |
| Nonanal        | 0,442 ± 0,101 <sup>a</sup> | 0,410 ± 0,071 <sup>a</sup> | 0,405 ± 0,102 <sup>a</sup> | 0,392 ± 0,148 <sup>a</sup> | 1,000      |
| Decanal        | 0,406 ± 0,138 <sup>a</sup> | 0,404 ± 0,130 <sup>a</sup> | 0,424 ± 0,123 <sup>a</sup> | 0,459 ± 0,138 <sup>a</sup> | 1,000      |
| Acetic acid    | 0,610 ± 0,117 <sup>a</sup> | 0,604 ± 0,132 <sup>a</sup> | 0,611 ± 0,121 <sup>a</sup> | 0,609 ± 0,149 <sup>a</sup> | 1,000      |
| Propanoic acid | 0,245 ± 0,155 <sup>a</sup> | 0,250 ± 0,181 <sup>a</sup> | 0,225 ± 0,161 <sup>a</sup> | 0,270 ± 0,147 <sup>a</sup> | 1,000      |
| Butanoic acid  | 0,363 ± 0,187 <sup>a</sup> | 0,354 ± 0,196 <sup>a</sup> | 0,373 ± 0,187 <sup>a</sup> | 0,439 ± 0,164 <sup>a</sup> | 1,000      |
| Pentanoic acid | 0,301 ± 0,172 <sup>a</sup> | 0,304 ± 0,179 <sup>a</sup> | 0,346 ± 0,169 <sup>a</sup> | 0,373 ± 0,179 <sup>a</sup> | 1,000      |
| Hexanoic acid  | 0,198 ± 0,179 <sup>a</sup> | 0,175 ± 0,170 <sup>a</sup> | 0,266 ± 0,186 <sup>a</sup> | 0,203 ± 0,193 <sup>a</sup> | 1,000      |
| Phenol         | 0,405 ± 0,155 <sup>a</sup> | 0,357 ± 0,153 <sup>a</sup> | 0,427 ± 0,116 <sup>a</sup> | 0,422 ± 0,141 <sup>a</sup> | 1,000      |
| Methyl-phenol  | 0,393 ± 0,150 <sup>a</sup> | 0,364 ± 0,185 <sup>a</sup> | 0,353 ± 0,190 <sup>a</sup> | 0,342 ± 0,163 <sup>a</sup> | 1,000      |
| Ethyl-phenol   | 0,334 ± 0,167 <sup>a</sup> | 0,329 ± 0,203 <sup>a</sup> | 0,301 ± 0,172 <sup>a</sup> | 0,318 ± 0,192 <sup>a</sup> | 1,000      |
| Propofol       | 0,252 ± 0,177 <sup>a</sup> | 0,193 ± 0,192 <sup>a</sup> | 0,195 ± 0,212 <sup>a</sup> | 0,319 ± 0,151 <sup>a</sup> | 1,000      |

| Compound       | Minimum                    |                            |                            |                            | $p$ -value |
|----------------|----------------------------|----------------------------|----------------------------|----------------------------|------------|
|                | TV=6mL kg <sup>-1</sup>    | TV=8mL kg <sup>-1</sup>    | TV=10mL kg <sup>-1</sup>   | TV=12mL kg <sup>-1</sup>   |            |
| Isoprene       | 0,217 ± 0,165 <sup>a</sup> | 0,236 ± 0,224 <sup>a</sup> | 0,273 ± 0,236 <sup>a</sup> | 0,301 ± 0,229 <sup>a</sup> | 1,000      |
| Acetone        | 0,189 ± 0,152 <sup>a</sup> | 0,230 ± 0,195 <sup>a</sup> | 0,186 ± 0,176 <sup>a</sup> | 0,195 ± 0,179 <sup>a</sup> | 1,000      |
| Propanal       | 0,246 ± 0,120 <sup>a</sup> | 0,242 ± 0,157 <sup>a</sup> | 0,279 ± 0,154 <sup>a</sup> | 0,296 ± 0,170 <sup>a</sup> | 1,000      |
| Butanal        | 0,302 ± 0,144 <sup>a</sup> | 0,298 ± 0,138 <sup>a</sup> | 0,308 ± 0,141 <sup>a</sup> | 0,365 ± 0,141 <sup>a</sup> | 1,000      |
| Pentanal       | 0,291 ± 0,096 <sup>a</sup> | 0,247 ± 0,121 <sup>a</sup> | 0,280 ± 0,121 <sup>a</sup> | 0,321 ± 0,143 <sup>a</sup> | 1,000      |
| Hexanal        | 0,229 ± 0,096 <sup>a</sup> | 0,237 ± 0,119 <sup>a</sup> | 0,232 ± 0,107 <sup>a</sup> | 0,208 ± 0,107 <sup>a</sup> | 1,000      |
| Heptanal       | 0,416 ± 0,129 <sup>a</sup> | 0,419 ± 0,105 <sup>a</sup> | 0,452 ± 0,105 <sup>a</sup> | 0,478 ± 0,136 <sup>a</sup> | 1,000      |
| Octanal        | 0,462 ± 0,106 <sup>a</sup> | 0,455 ± 0,100 <sup>a</sup> | 0,488 ± 0,082 <sup>a</sup> | 0,467 ± 0,103 <sup>a</sup> | 1,000      |
| Nonanal        | 0,391 ± 0,120 <sup>a</sup> | 0,422 ± 0,131 <sup>a</sup> | 0,390 ± 0,131 <sup>a</sup> | 0,433 ± 0,129 <sup>a</sup> | 1,000      |
| Decanal        | 0,419 ± 0,147 <sup>a</sup> | 0,411 ± 0,115 <sup>a</sup> | 0,471 ± 0,092 <sup>a</sup> | 0,509 ± 0,103 <sup>a</sup> | 0,537      |
| Acetic acid    | 0,353 ± 0,137 <sup>a</sup> | 0,343 ± 0,133 <sup>a</sup> | 0,348 ± 0,141 <sup>a</sup> | 0,403 ± 0,146 <sup>a</sup> | 1,000      |
| Propanoic acid | 0,196 ± 0,140 <sup>a</sup> | 0,234 ± 0,162 <sup>a</sup> | 0,196 ± 0,163 <sup>a</sup> | 0,184 ± 0,169 <sup>a</sup> | 1,000      |
| Butanoic acid  | 0,293 ± 0,143 <sup>a</sup> | 0,335 ± 0,146 <sup>a</sup> | 0,346 ± 0,201 <sup>a</sup> | 0,302 ± 0,241 <sup>a</sup> | 1,000      |
| Pentanoic acid | 0,338 ± 0,160 <sup>a</sup> | 0,383 ± 0,183 <sup>a</sup> | 0,435 ± 0,210 <sup>a</sup> | 0,452 ± 0,155 <sup>a</sup> | 1,000      |
| Hexanoic acid  | 0,114 ± 0,139 <sup>a</sup> | 0,197 ± 0,214 <sup>a</sup> | 0,201 ± 0,259 <sup>a</sup> | 0,262 ± 0,252 <sup>a</sup> | 1,000      |
| Phenol         | 0,350 ± 0,127 <sup>a</sup> | 0,358 ± 0,121 <sup>a</sup> | 0,373 ± 0,156 <sup>a</sup> | 0,412 ± 0,106 <sup>a</sup> | 1,000      |
| Methyl-phenol  | 0,321 ± 0,168 <sup>a</sup> | 0,321 ± 0,144 <sup>a</sup> | 0,319 ± 0,143 <sup>a</sup> | 0,286 ± 0,162 <sup>a</sup> | 1,000      |
| Ethyl-phenol   | 0,272 ± 0,212 <sup>a</sup> | 0,294 ± 0,148 <sup>a</sup> | 0,248 ± 0,194 <sup>a</sup> | 0,248 ± 0,204 <sup>a</sup> | 1,000      |
| Propofol       | 0,209 ± 0,200 <sup>a</sup> | 0,203 ± 0,188 <sup>a</sup> | 0,243 ± 0,200 <sup>a</sup> | 0,260 ± 0,151 <sup>a</sup> | 1,000      |
